# Supplementary material
Source: PubMed Central journal article supplement (PMC4522947)
Supplement: Supp_Table1.pdf [file Supp_Table1.pdf]

## Supplementary Data

SUPPLEMENTARY TABLE S1. COMPARISON OF PATIENT CHARACTERISTIC AND CLINICAL OUTCOMES BETWEEN *CLOSTRIDIUM DIFFICILE* AND NON-*CLOSTRIDIUM DIFFICILE* COHORTS AFTER EXCLUSION OF EARLY MORTALITY

|                                                  | Non-C. difficile       |                                   |                                       |                          | p <sup>a</sup> | p <sup>b</sup> | p <sup>c</sup> |
|--------------------------------------------------|------------------------|-----------------------------------|---------------------------------------|--------------------------|----------------|----------------|----------------|
|                                                  | C. difficile<br>(n=67) | All non-C. difficile<br>(n=1,798) | Complicated/intermediate<br>(n=1,418) | Uncomplicated<br>(n=380) |                |                |                |
| <b>Demographics and baseline characteristics</b> |                        |                                   |                                       |                          |                |                |                |
| Female, n (%)                                    | 17 (25%)               | 602 (33%)                         | 463 (33%)                             | 139 (37%)                | 0.1664         | 0.2132         | 0.076          |
| Age, median (25th, 75th)                         | 42 (24, 56)            | 41 (26, 55)                       | 43 (27, 56)                           | 35.5 (24, 47)            | 0.5898         | 0.9778         | 0.0217         |
| NISS, median (25th, 75th)                        | 38 (27, 48)            | 31 (26, 41)                       | 32 (27, 41)                           | 27 (22, 38)              | 0.0018         | 0.0079         | <0.0001        |
| NISS > 34, n (%)                                 | 38 (57%)               | 575 (32%)                         | 476 (34%)                             | 99 (26%)                 | <0.0001        | <0.0001        | <0.0001        |
| Day of diagnosis, Median (25th, 75th)            | 10 ( 7, 16)            | N/A                               | N/A                                   | N/A                      |                |                |                |
| Max AIS, median (25th, 75th)                     | 5 ( 4, 5)              | 4 ( 3, 5)                         | 4 ( 4, 5)                             | 4 ( 3, 4)                | 0.0019         | 0.0156         | <0.0001        |
| <b>Clinical outcomes</b>                         |                        |                                   |                                       |                          |                |                |                |
| Hospital mortality, n (%)                        | 4 ( 6%)                | 157 ( 9%)                         | 156 (11%)                             | 1 ( 0.3%)                | 0.4293         | 0.1943         | 0.0021         |
| Hospital length of stay, Median (25th, 75th)     | 29 (21, 42)            | 20 (12, 31)                       | 10 ( 5, 17)                           | 10 ( 7, 15)              | <0.0001        | 0.001          | <0.0001        |
| Ventilation days, Median (25th, 75th)            | 14.5 ( 7, 22)          | 7 ( 3, 14)                        | 35.5 (24, 47)                         | 2 ( 1, 2)                | <0.0001        | 0.0088         | <0.0001        |

p<sup>a</sup> compares C. difficile and all non-C. difficile patients; p<sup>b</sup> compares C. difficile patients with complicated/intermediate non-C. difficile patients; p<sup>c</sup> compares C. difficile patients with uncomplicated non-C. difficile patients. NISS= new injury severity score; AIS= abbreviated injury score.
