# Supplementary material
Source: PubMed Central journal article supplement (PMC4522947)
Supplement: Supp_Table2.pdf [file Supp_Table2.pdf]

SUPPLEMENTARY TABLE S2. COMPARISON OF PATIENT CLINICAL CHARACTERISTICS BETWEEN *CLOSTRIDIUM DIFFICILE* AND NON-*CLOSTRIDIUM DIFFICILE* COHORTS AFTER EXCLUSION OF EARLY MORTALITY

| Clinical characteristics                  | Non-C. difficile         |                                     |                                         |                            | p <sup>c</sup> |
|-------------------------------------------|--------------------------|-------------------------------------|-----------------------------------------|----------------------------|----------------|
|                                           | C. difficile<br>(n = 67) | All non-C. difficile<br>(n = 1,798) | Complicated/intermediate<br>(n = 1,418) | Uncomplicated<br>(n = 380) |                |
| <b>Admission</b>                          |                          |                                     |                                         |                            |                |
| Marshall Score                            | 6 ( 4.7, 8.2)            | 4.9 ( 3.3, 6.8)                     | 5.6 ( 4.2, 7.3)                         | 2.4 ( 1.7, 3.3)            | 0.001          |
| Denver Score                              | 2 ( 1.5, 3)              | 2 ( 0, 3)                           | 2 ( 1, 4)                               | 0 ( 0, 1)                  | 0.049          |
| Creatinine (mg/dL)                        | 1 ( 0.8, 1.3)            | 1 ( 1, 1)                           | 1 ( 1, 1)                               | 0.8 ( 0.7, 0.9)            | 0.769          |
| Alk phos (units/L)                        | 136 ( 76, 219)           | 51 ( 40, 63)                        | 50 ( 40, 61)                            | 55 ( 47, 79)               | <0.0001        |
| Albumin (g/dL)                            | 2.3 ( 1.6, 2.7)          | 2.1 ( 1.8, 2.4)                     | 2.1 ( 1.8, 2.4)                         | 2.3 ( 1.9, 2.6)            | 0.413          |
| WBC (1,000/ml)                            | 13.5 ( 8.9, 19.6)        | 11.7 ( 8.6, 15.9)                   | 10.2 ( 7.3, 14.6)                       | 13 ( 9.8, 16.6)            | 0.096          |
| Neutrophil count (1,000/ml)               | 79.3 ( 11.4, 87.2)       | 6.3 ( 1.4, 9.5)                     | 8 ( 5.8, 11.7)                          | 11.2 ( 8.4, 14.4)          | <0.0001        |
| Lymphocyte count (1,000/mm <sup>3</sup> ) | 2 ( 1, 5)                | 1.3 ( 0.7, 7.1)                     | 0.9 ( 0.6, 1.4)                         | 0.9 ( 0.7, 1.2)            | <0.0001        |
| Platelet count (1,000/mm <sup>3</sup> )   | 99.5 ( 83, 134)          | 101 ( 80, 128)                      | 97 ( 78, 121)                           | 129 ( 109, 158)            | 0.447          |
| P:F (per unit change)                     | 169 (100, 270)           | 230 (162, 313)                      | 225 (159, 307.5)                        | 312 ( 225, 353)            | 0.001          |
| Glucose (mg/dL)                           | 206.5 (150.5, 249.5)     | 189 (161, 235)                      | 198 (165, 246)                          | 171 ( 147, 199)            | 0.903          |
| Lactate (mmol/L)                          | 5.2 ( 3.5, 6.9)          | 2.9 ( 2, 4.2)                       | 3 ( 2.1, 4.4)                           | 2.2 ( 1.3, 2.8)            | <0.0001        |
| Base deficit (mEq/L)                      | -9.7 (-12, -7.6)         | -9.5 (-12.7, -6.9)                  | -10 (-13, -7)                           | -8 (-10.3, -6.1)           | 0.774          |
| <b>Day 7</b>                              |                          |                                     |                                         |                            |                |
| Marshall Score                            | 5 ( 5, 8)                |                                     | 5 ( 2, 7)                               |                            | 0.005          |
| Denver Score                              | 3 ( 1, 4)                |                                     | 0 ( 0, 1)                               |                            | <0.0001        |
| Creatinine (mg/dl)                        | 0.8 ( 0.6, 1)            |                                     | 0.7 ( 0.6, 0.9)                         |                            | 0.565          |
| Alk phos (units/L)                        | 80 ( 58, 123)            |                                     | 80 ( 61, 113)                           |                            | 0.927          |
| Albumin (g/dL)                            | 2.1 ( 1.7, 2.4)          |                                     | 1.8 ( 1.5, 2.1)                         |                            | 0.020          |
| WBC (1,000/ml)                            | 12.4 ( 8.8, 18.2)        |                                     | 12.6 ( 9.5, 16.8)                       |                            | 0.8799         |
| Neutrophil count (1,000/ml)               | 12.8 ( 9.2, 79.2)        |                                     | 9.8 ( 7, 14.8)                          |                            | 0.029          |
| Lymphocyte count (1,000/ml)               | 2.6 ( 1.2, 6.5)          |                                     | 1.2 ( 0.8, 1.7)                         |                            | 0.001          |
| Platelet Count (1,000/mm <sup>3</sup> )   | 238 (173, 309)           |                                     | 220 (154, 290)                          |                            | 0.217          |
| P:F (per unit change)                     | 228 (132, 272)           |                                     | 211 (162, 283)                          |                            | 0.517          |
| <b>Day 14</b>                             |                          |                                     |                                         |                            |                |
| Marshall Score                            | 5 ( 4, 7)                |                                     | 3 ( 0, 5)                               |                            | <0.0001        |
| Denver Score                              | 2 ( 1, 4)                |                                     | 0 ( 0, 0)                               |                            | <0.0001        |
| Creatinine (mg/dl)                        | 0.7 ( 0.5, 1.1)          |                                     | 0.7 ( 0.6, 1)                           |                            | 0.908          |
| Alk phos (units/L)                        | 144 ( 65, 254)           |                                     | 162 (117, 229)                          |                            | 0.380          |
| Albumin (g/dL)                            | 1.9 ( 1.7, 2.6)          |                                     | 1.8 ( 1.5, 2.1)                         |                            | 0.067          |
| WBC (1,000/ml)                            | 15 ( 11.8, 19.9)         |                                     | 14.2 ( 10.9, 18.1)                      |                            | 0.335          |
| Neutrophil Count (1,000/ml)               | 73.5 ( 15.8, 79.4)       |                                     | 10.5 ( 7.6, 14.4)                       |                            | 0.0003         |
| Lymphocyte Count (1,000/ml)               | 6.2 ( 2.1, 9.0)          |                                     | 1.4 ( 1, 2)                             |                            | <0.0001        |
| Platelet Count (1,000/mm <sup>3</sup> )   | 505.5 (344, 696)         |                                     | 529 (374, 763)                          |                            | 0.410          |
| P:F (per unit change)                     | 244.5 (184, 328)         |                                     | 213 (158, 274)                          |                            | 0.062          |

All values represent medians and the 25th and 75th percentiles unless otherwise specified. p<sup>a</sup> compares C. difficile and all non-C. difficile patients; p<sup>b</sup> compares C. difficile patients with complicated/intermediate non-C. difficile patients; p<sup>c</sup> compares C. difficile patients with uncomplicated non-C. difficile patients' worst values over their stay. WBC = white blood cell count; alk phos = alkaline phosphatase; P:F = P:O<sub>2</sub>:F:O<sub>2</sub> ratio.
